# Supplementary material for: Fullerene rotational dynamics generate disordered configurations that suppress thermal conductivity in superatomic crystals
Source: Royal Society of Chemistry journal article supplement (doi:10.1039/d0nh00358a), 2020-01-01
Supplement: d0nh00358a1.zip [file d0nh00358a1.zip]

# Fullerene Rotational Dynamics Generate Disordered Configurations That Suppress Thermal Conductivity in Superatomic Crystals

Qi Liang,<sup>‡a,b</sup> Matthew Bartnof,<sup>‡b</sup> Ya-Ling He,<sup>a</sup> Jonathan A. Malen,<sup>b</sup> and Alan J. H. McGaughey<sup>\*b</sup>

<sup>a</sup> *Key Laboratory of Thermo-Fluid Science and Engineering of Ministry of Education, School of Energy and Power Engineering, Xi'an Jiaotong University, Xi'an, Shaanxi, 710049, China.*

<sup>b</sup> *Department of Mechanical Engineering, Carnegie Mellon University, Pittsburgh, Pennsylvania 15213, USA. E-mail: mcgaughey@cmu.edu*

<sup>‡</sup> These authors contributed equally to this work.

## Contents

|                                                |    |
|------------------------------------------------|----|
| S1 Atomic Structure                            | 2  |
| S2 Bulk Modulus                                | 12 |
| S3 Thermal Conductivity                        | 14 |
| S4 Carbon Atom Trajectories                    | 16 |
| S5 C <sub>60</sub> Relative Angle Distribution | 18 |
| S6 Rotational Potential Energy Barrier         | 20 |

## S1 Atomic Structure

We downloaded the ‘mol2’ files for the superatomic crystals (SACs) from the CCDC<sup>1</sup> to build the structures for the MD simulations. All structures were initially built with the experimental unit cell parameters (i.e., lattice constants and angles) and then relaxed in the *NPT* ensemble (i.e., constant number of atoms  $N$ , pressure  $P$ , and temperature  $T$ ) to get the zero-pressure unit cell parameters. The methodology for  $[\text{C}_{60}]$  and the binary SACs  $[\text{Co}_6\text{Se}_8(\text{PEt}_3)_6][\text{C}_{60}]_2$  ( $[\text{CoSe}][\text{C}_{60}]_2$ ) and  $[\text{Co}_6\text{Te}_8(\text{PEt}_3)_6][\text{C}_{60}]_2$  ( $[\text{CoTe}][\text{C}_{60}]_2$ ) is described in the main text.

We also studied the unary SACs  $[\text{Co}_6\text{S}_8(\text{PEt}_3)_6][\text{C}_7\text{H}_8]$  ( $[\text{CoS}]$ ),  $[\text{Co}_6\text{Se}_8(\text{PEt}_3)_6][\text{C}_7\text{H}_8]$  ( $[\text{CoSe}]$ ) and  $[\text{Co}_6\text{Te}_8(\text{PEt}_3)_6]$  ( $[\text{CoTe}]$ ). At the experimental temperatures where data are available, the space group of  $[\text{CoS}]$  is  $\text{R}\bar{3}$  (100 K and 293 K) and the space group of  $[\text{CoTe}]$  is  $\text{P}\bar{1}$  (100 K).  $[\text{CoSe}]$  experiences a phase transition from  $\text{P}\bar{1}$  to  $\text{R}\bar{3}$  between temperatures of 100 K and 293 K.  $[\text{CoS}]$  and  $[\text{CoSe}]$  contain one toluene molecule per cluster, which freely rotates within the space between the superatoms. For the unary SACs with space group  $\text{R}\bar{3}$ , the three side lengths of the simulation box were controlled independently, while the angles were fixed at the experimental values. For  $[\text{CoSe}]$  with space group  $\text{P}\bar{1}$ , the three side lengths and the three angles of the simulation box were controlled independently. For  $[\text{CoTe}]$ , the three side lengths and the three angles of the simulation box were controlled independently at a temperature of 100 K. The angles were then fixed at the values calculated at a temperature of 100 K when running the *NPT* ensemble simulations to determine the higher temperature lattice constants.

The crystal structures and obtained zero-pressure unit cell parameters for all studied SACs are provided in Figures S1-S9 and Tables S1-S9. Experimental data are included for comparison.<sup>2,3</sup>

Input and potential generating files for our implementation of the UFF for SACs in LAMMPS is available as part of the Supplementary Information. See “SAC\_UFF.lt” for all the Universal Force Field parameters as calculated by OpenBabel<sup>4</sup> in a format compatible with MolTemplate.<sup>5</sup> See the data files for the atomic positions at a temperature of 300 K, using the base files O’Brien et al. submitted to the CCDC<sup>1</sup> with atomic charges calculated using the extended charge equilibration method<sup>6</sup> as calculated by OpenBabel<sup>4</sup>.

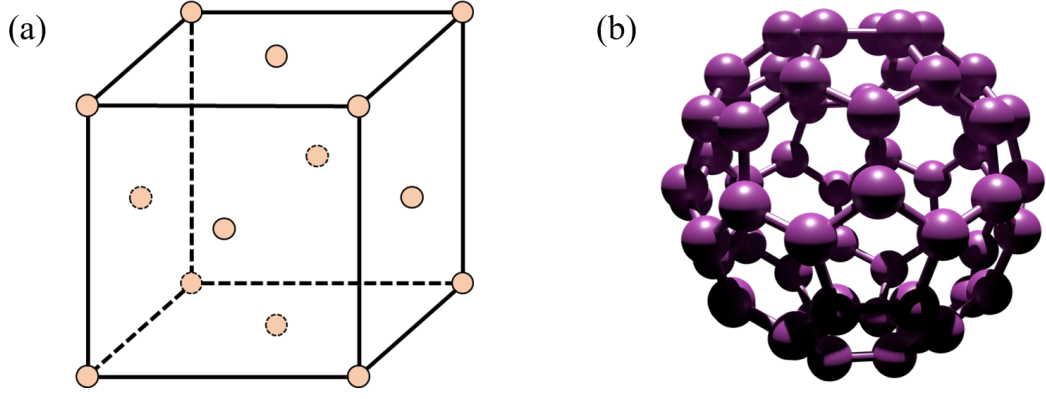

Figure S1: (a) Crystal structure and (b) basis of  $[C_{60}]$  ( $Fm\bar{3}m$ ). C = purple.

Table S1: Lattice constant of  $[C_{60}]$  ( $Fm\bar{3}m$ ).  $\alpha = \beta = \gamma = 90^\circ$ .

| $T$ (K) | Experimental data        |                             | Predicted data           |                             |
|---------|--------------------------|-----------------------------|--------------------------|-----------------------------|
|         | $a/b/c$ ( $\text{\AA}$ ) | Density ( $\text{g/cm}^3$ ) | $a/b/c$ ( $\text{\AA}$ ) | Density ( $\text{g/cm}^3$ ) |
| 25      | 14.0348                  | 1.7300                      | 13.8311                  | 1.8093                      |
| 50      | 14.0430                  | 1.7269                      | 13.8358                  | 1.8074                      |
| 75      | 14.0512                  | 1.7239                      | 13.8412                  | 1.8051                      |
| 100     | 14.0594                  | 1.7209                      | 13.8462                  | 1.8027                      |
| 125     | 14.0676                  | 1.7179                      | 13.8523                  | 1.8004                      |
| 150     | 14.0758                  | 1.7149                      | 13.8578                  | 1.7986                      |
| 175     | 14.0840                  | 1.7119                      | 13.8643                  | 1.7960                      |
| 200     | 14.0922                  | 1.7089                      | 13.8742                  | 1.7930                      |
| 225     | 14.1004                  | 1.7059                      | 13.9008                  | 1.7824                      |
| 250     | 14.1086                  | 1.7030                      | 13.9069                  | 1.7799                      |
| 275     | 14.1168                  | 1.7000                      | 13.9128                  | 1.7774                      |
| 300     | 14.1250                  | 1.6970                      | 13.9188                  | 1.7742                      |

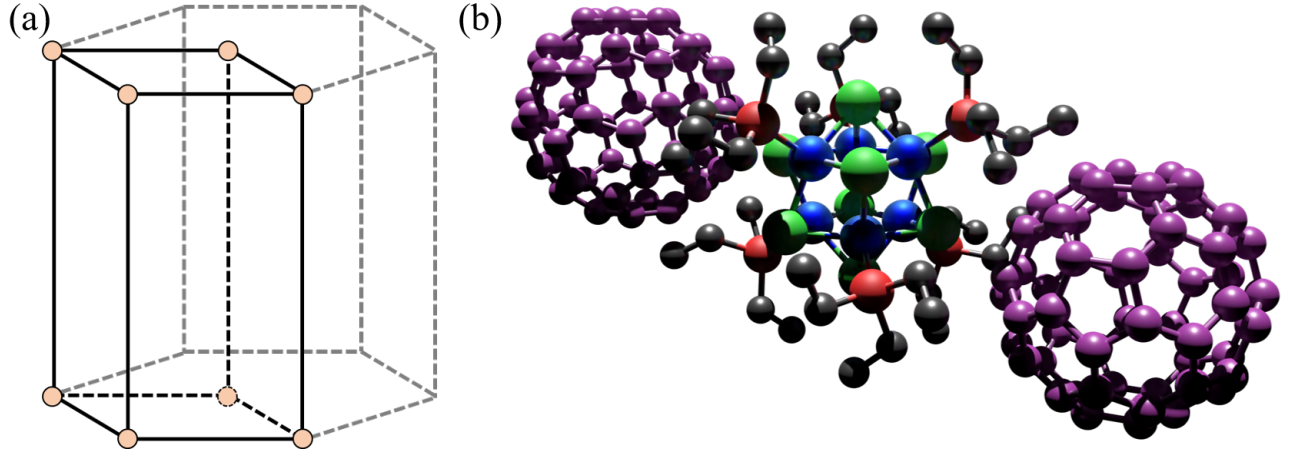

Figure S2: (a) Crystal structure and (b) basis of  $[\text{CoSe}][\text{C}_{60}]_2$  ( $P\bar{3}$ ). Co = blue, Se = green, P = red, C in CoSe = black, C in  $\text{C}_{60}$  = purple. Hydrogen atoms are removed to clarify the view.

Table S2: Lattice constants of  $[\text{CoSe}][\text{C}_{60}]_2$  ( $P\bar{3}$ ).  $\alpha = \beta = 90^\circ, \gamma = 120^\circ$ .

| $T$ (K) | Experimental data |         |                              | Predicted data |         |                              |
|---------|-------------------|---------|------------------------------|----------------|---------|------------------------------|
|         | $a/b$ (Å)         | $c$ (Å) | Density (g/cm <sup>3</sup> ) | $a/b$ (Å)      | $c$ (Å) | Density (g/cm <sup>3</sup> ) |
| 25      |                   |         |                              | 15.9284        | 12.2766 | 1.9303                       |
| 50      |                   |         |                              | 15.9281        | 12.3033 | 1.9260                       |
| 75      |                   |         |                              | 15.9275        | 12.3264 | 1.9227                       |
| 100     | 15.7282           | 12.5180 | 1.9415                       | 15.8814        | 12.4316 | 1.9178                       |
| 125     | 15.7619           | 12.5214 | 1.9327                       | 15.8809        | 12.4518 | 1.9148                       |
| 150     | 15.7562           | 12.5521 | 1.9294                       | 15.8931        | 12.4713 | 1.9088                       |
| 175     | 15.7555           | 12.5483 | 1.9301                       | 15.8915        | 12.4929 | 1.9051                       |
| 200     | 15.8376           | 12.4483 | 1.9255                       | 15.8984        | 12.5173 | 1.8999                       |
| 250     | 15.8702           | 12.4871 | 1.9117                       | 15.9069        | 12.5603 | 1.8911                       |
| 300     | 15.8893           | 12.5167 | 1.9026                       | 15.9171        | 12.5981 | 1.8843                       |



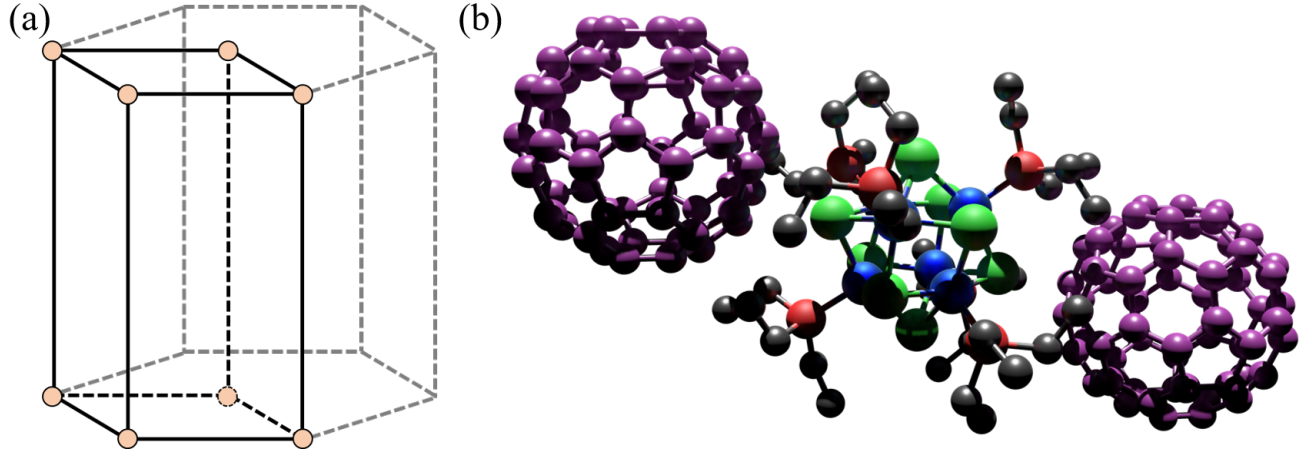

Figure S3: (a) Crystal structure and (b) basis of  $[\text{CoSe}][\text{C}_{60}]_2$  ( $\text{P}\bar{3}\text{m}1$ ). Co = blue, Se = green, P = red, C in CoSe = black, C in  $\text{C}_{60}$  = purple. Hydrogen atoms are removed to clarify the view.

Table S3: Lattice constants of  $[\text{CoSe}][\text{C}_{60}]_2$  ( $\text{P}\bar{3}\text{m}1$ ).  $\alpha = \beta = 90^\circ, \gamma = 120^\circ$ .

| $T$ (K) | Experimental data |         |                              | Predicted data |         |                              |
|---------|-------------------|---------|------------------------------|----------------|---------|------------------------------|
|         | $a/b$ (Å)         | $c$ (Å) | Density (g/cm <sup>3</sup> ) | $a/b$ (Å)      | $c$ (Å) | Density (g/cm <sup>3</sup> ) |
| 25      |                   |         |                              | 15.9933        | 12.3432 | 1.9041                       |
| 50      |                   |         |                              | 15.9836        | 12.3782 | 1.9015                       |
| 100     | 15.7282           | 12.5180 | 1.9415                       | 16.0131        | 12.3684 | 1.8958                       |
| 150     | 15.7562           | 12.5521 | 1.9294                       | 16.0217        | 12.4165 | 1.8855                       |
| 200     | 15.8376           | 12.4483 | 1.9255                       | 16.0344        | 12.4541 | 1.8774                       |
| 250     | 15.8702           | 12.4871 | 1.9117                       | 16.0406        | 12.5052 | 1.8703                       |
| 300     | 15.8893           | 12.5167 | 1.9026                       | 16.0499        | 12.5493 | 1.8581                       |

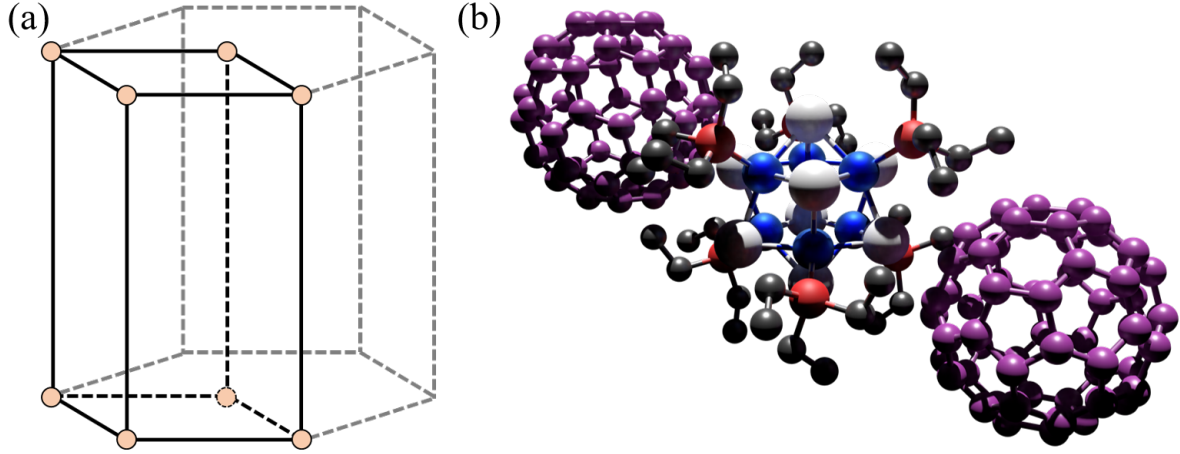

Figure S4: (a) Crystal structure and (b) basis of  $[\text{CoTe}][\text{C}_{60}]_2$  ( $P\bar{3}$ ). Co = blue, Te = white, P = red, C in CoTe = black, C in  $\text{C}_{60}$  = purple. Hydrogen atoms are removed to clarify the view.

Table S4: Lattice constants of  $[\text{CoTe}][\text{C}_{60}]_2$  ( $P\bar{3}$ ).  $\alpha = \beta = 90^\circ, \gamma = 120^\circ$ .

| $T$ (K) | Experimental data |         |                              | Predicted data |         |                              |
|---------|-------------------|---------|------------------------------|----------------|---------|------------------------------|
|         | $a/b$ (Å)         | $c$ (Å) | Density (g/cm <sup>3</sup> ) | $a/b$ (Å)      | $c$ (Å) | Density (g/cm <sup>3</sup> ) |
| 25      |                   |         |                              | 16.1784        | 12.3185 | 2.0958                       |
| 50      |                   |         |                              | 16.1793        | 12.3445 | 2.0921                       |
| 75      |                   |         |                              | 16.1944        | 12.3382 | 2.0888                       |
| 100     | 16.0555           | 12.2192 | 2.1456                       | 16.2003        | 12.3476 | 2.0854                       |
| 125     | 16.0559           | 12.2604 | 2.1382                       | 16.1964        | 12.3925 | 2.0788                       |
| 150     | 16.0473           | 12.3338 | 2.1278                       | 16.1947        | 12.4348 | 2.0719                       |
| 175     | 16.0428           | 12.3957 | 2.1184                       | 16.1974        | 12.4627 | 2.0680                       |
| 200     | 15.9955           | 12.4066 | 2.1290                       | 16.1997        | 12.4922 | 2.0623                       |
| 250     | 16.0702           | 12.4759 | 2.0970                       | 16.2073        | 12.5395 | 2.0520                       |
| 300     | 16.0906           | 12.5353 | 2.0820                       | 16.2178        | 12.5782 | 2.0426                       |

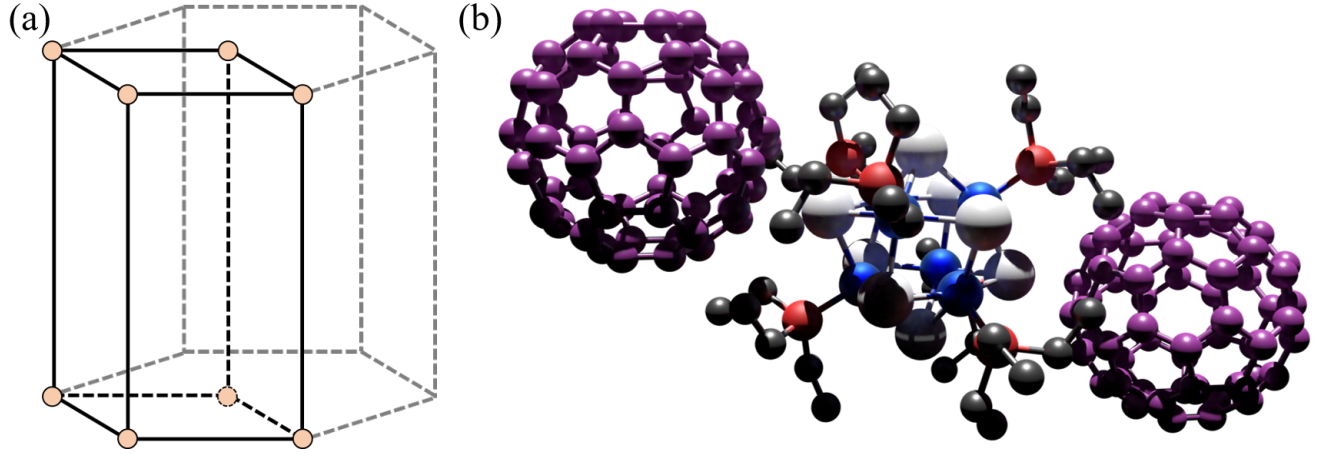

Figure S5: (a) Crystal structure and (b) basis of  $[\text{CoTe}][\text{C}_{60}]_2$  ( $\text{P}\bar{3}\text{m}1$ ). Co = blue, Te = white, P = red, C in CoTe = black, C in  $\text{C}_{60}$  = purple. Hydrogen atoms are removed to clarify the view.

Table S5: Lattice constants of  $[\text{CoTe}][\text{C}_{60}]_2$  ( $\text{P}\bar{3}\text{m}1$ ).  $\alpha = \beta = 90^\circ, \gamma = 120^\circ$ .

| $T$ (K) | Experimental data |         |                              | Predicted data |         |                              |
|---------|-------------------|---------|------------------------------|----------------|---------|------------------------------|
|         | $a/b$ (Å)         | $c$ (Å) | Density (g/cm <sup>3</sup> ) | $a/b$ (Å)      | $c$ (Å) | Density (g/cm <sup>3</sup> ) |
| 25      |                   |         |                              | 16.1500        | 12.3891 | 2.0915                       |
| 50      |                   |         |                              | 16.1680        | 12.3880 | 2.0871                       |
| 100     | 16.0555           | 12.2192 | 2.1456                       | 16.1957        | 12.3607 | 2.0838                       |
| 150     | 16.0473           | 12.3338 | 2.1278                       | 16.1954        | 12.4322 | 2.0733                       |
| 200     | 15.9955           | 12.4066 | 2.1290                       | 16.1997        | 12.4912 | 2.0601                       |
| 250     | 16.0702           | 12.4759 | 2.0970                       | 16.2074        | 12.5396 | 2.0517                       |
| 300     | 16.0906           | 12.5353 | 2.0820                       | 16.2176        | 12.5792 | 2.0437                       |

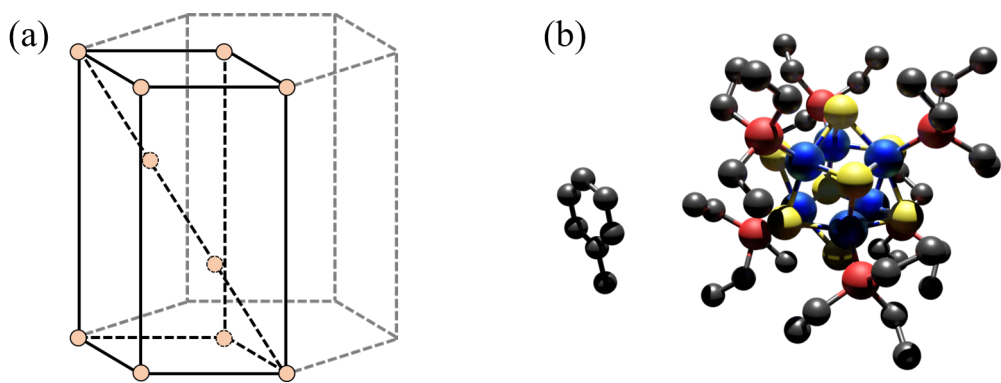

Figure S6: (a) Crystal structure and (b) basis of  $[\text{CoS}] (\text{R}\bar{3})$ . Co = blue, S = yellow, P = red, C = black. Hydrogen atoms are removed to clarify the view.

Table S6: Lattice constants of  $[\text{CoS}] (\text{R}\bar{3})$ .  $\alpha = \beta = 90^\circ, \gamma = 120^\circ$ .

| $T$ (K) | Experimental data |         |                              | Predicted data |         |                              |
|---------|-------------------|---------|------------------------------|----------------|---------|------------------------------|
|         | $a/b$ (Å)         | $c$ (Å) | Density (g/cm <sup>3</sup> ) | $a/b$ (Å)      | $c$ (Å) | Density (g/cm <sup>3</sup> ) |
| 100     | 16.7652           | 19.2013 | 1.5058                       | 17.3716        | 19.5400 | 1.3766                       |
| 150     |                   |         |                              | 17.4133        | 19.5790 | 1.3673                       |
| 200     |                   |         |                              | 17.4574        | 19.6106 | 1.3582                       |
| 250     |                   |         |                              | 17.5018        | 19.6384 | 1.3495                       |
| 293     | 16.9491           | 19.2886 | 1.4650                       |                |         |                              |
| 300     |                   |         |                              | 17.5492        | 19.6691 | 1.3401                       |

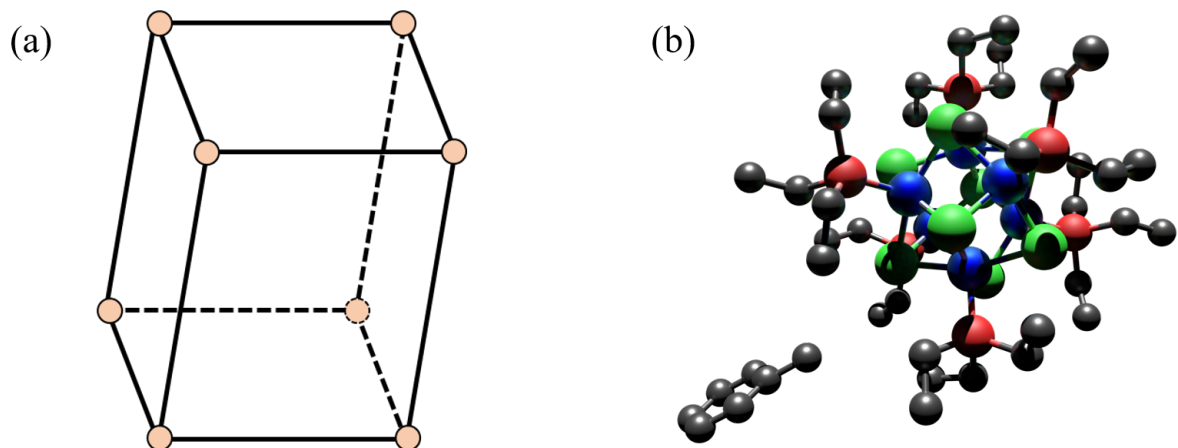

Figure S7: (a) Crystal structure and (b) basis of  $[\text{CoSe}] (\text{P}\bar{1})$ . Co = blue, Se = green, P = red, C = black. Hydrogen atoms are removed to clarify the view.

Table S7: Lattice constants and angles of  $[\text{CoSe}] (\text{P}\bar{1})$ . The measured lattice constants and angles at a temperature of 100 K are  $a = 11.6534 \text{ \AA}$ ,  $b = 11.7631 \text{ \AA}$ ,  $c = 11.7664 \text{ \AA}$ ,  $\alpha = 93.4394^\circ$ ,  $\beta = 90.5354^\circ$ , and  $\gamma = 94.1205^\circ$ , and the density is  $1.8473 \text{ g/cm}^3$ .

| $T$ (K) | $a$ ( $\text{\AA}$ ) | $b$ ( $\text{\AA}$ ) | $c$ ( $\text{\AA}$ ) | $\alpha$ ( $^\circ$ ) | $\beta$ ( $^\circ$ ) | $\gamma$ ( $^\circ$ ) | Density<br>( $\text{g/cm}^3$ ) |
|---------|----------------------|----------------------|----------------------|-----------------------|----------------------|-----------------------|--------------------------------|
| 100     | 11.8147              | 11.8918              | 12.1765              | 93.4430               | 89.9499              | 94.4722               | 1.7425                         |
| 150     | 11.8502              | 11.9517              | 12.1989              | 93.4678               | 90.1323              | 94.4007               | 1.7253                         |
| 200     | 11.8925              | 12.0075              | 12.2160              | 93.4313               | 90.3615              | 94.3146               | 1.7086                         |
| 250     | 12.1135              | 12.1095              | 12.1164              | 92.8980               | 92.8204              | 92.8316               | 1.6755                         |
| 300     | 12.1570              | 12.1516              | 12.1541              | 92.9584               | 92.9484              | 92.8839               | 1.6589                         |

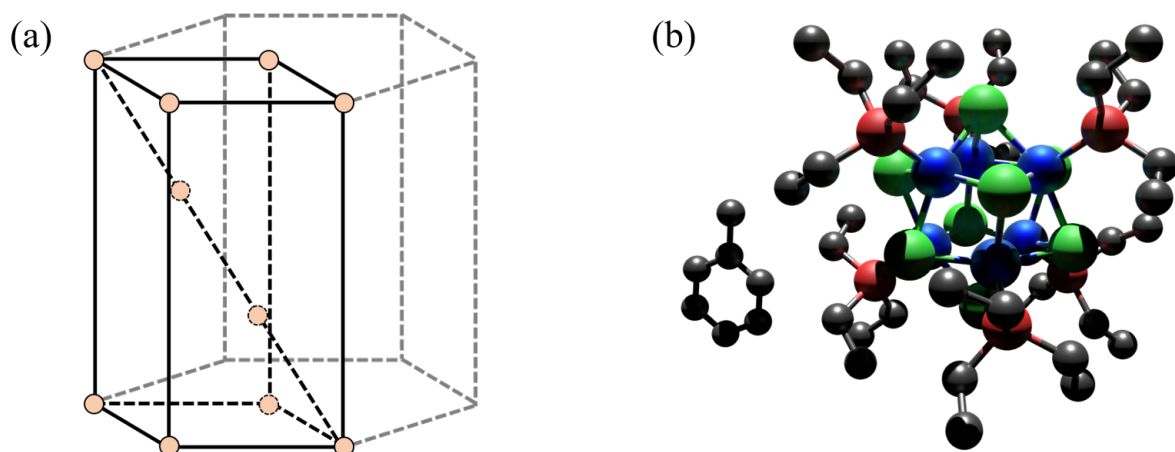

Figure S8: (a) Crystal structure and (b) basis of  $[\text{CoSe}] (\text{R}\bar{3})$ . Co = blue, Se = green, P = red, C = black. Hydrogen atoms are removed to clarify the view.

Table S8: Lattice constants of  $[\text{CoSe}] (\text{R}\bar{3})$ .  $\alpha = \beta = 90^\circ, \gamma = 120^\circ$ . The measured lattice constants at a temperature of 293 K are  $a = b = 17.1316 \text{ \AA}$ , and  $c = 19.4810 \text{ \AA}$ , and the density is  $1.7972 \text{ g/cm}^3$ .

| $T$ (K) | $a/b$ ( $\text{\AA}$ ) | $c$ ( $\text{\AA}$ ) | Density<br>( $\text{g/cm}^3$ ) |
|---------|------------------------|----------------------|--------------------------------|
| 100     | 17.3104                | 19.8131              | 1.7309                         |
| 150     | 17.3931                | 19.8683              | 1.7097                         |
| 200     | 17.4931                | 19.9022              | 1.6873                         |
| 250     | 17.5635                | 19.9251              | 1.6719                         |
| 300     | 17.6259                | 19.9537              | 1.6577                         |

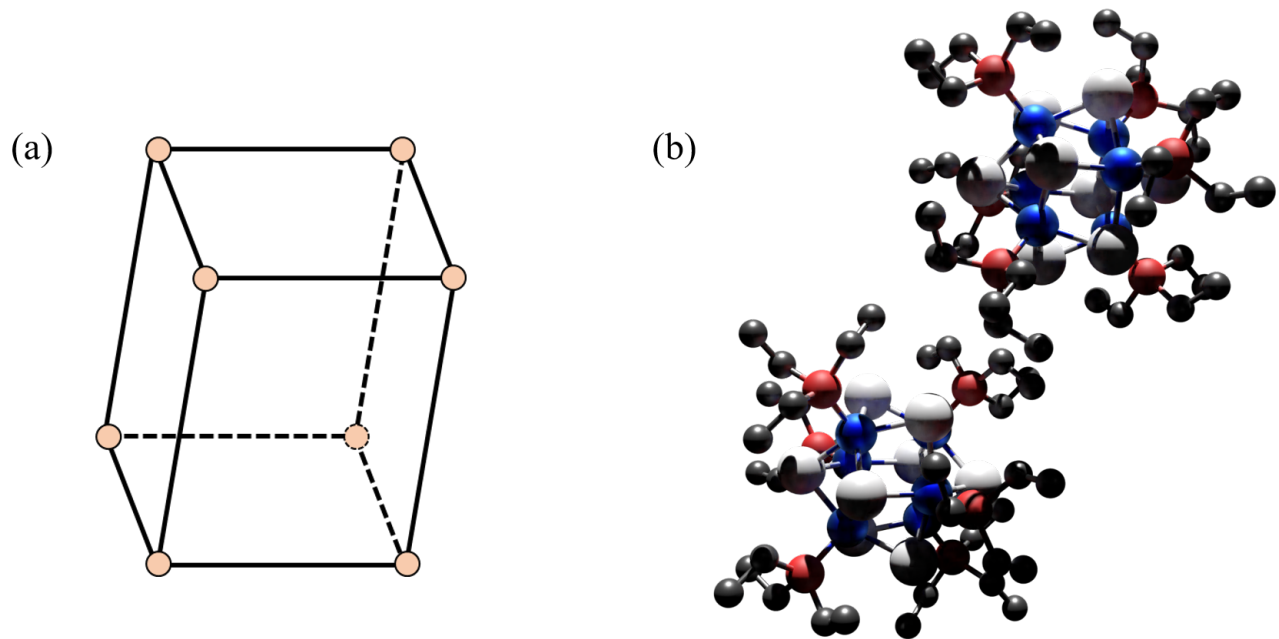

Figure S9: (a) Crystal structure and (b) basis of  $[\text{CoTe}] (\text{P}\bar{1})$ . Co = blue, Te = white, P = red, C = black. Hydrogen atoms are removed to clarify the view.

Table S9: Lattice constants of  $[\text{CoTe}] (\text{P}\bar{1})$ .  $\alpha = 88.648^\circ, \beta = 86.025^\circ, \gamma = 72.757^\circ$ . The measured lattice constants at a temperature of 100 K are  $a = 12.1664 \text{ \AA}$ ,  $b = 13.0458 \text{ \AA}$ , and  $c = 20.1918 \text{ \AA}$ , and the density is  $2.2918 \text{ g/cm}^3$ .

| $T$ (K) | $a$ ( $\text{\AA}$ ) | $b$ ( $\text{\AA}$ ) | $c$ ( $\text{\AA}$ ) | Density ( $\text{g/cm}^3$ ) |
|---------|----------------------|----------------------|----------------------|-----------------------------|
| 100     | 12.5349              | 13.1153              | 20.4883              | 2.1561                      |
| 150     | 12.5503              | 13.1309              | 20.5519              | 2.1442                      |
| 200     | 12.5661              | 13.1463              | 20.6171              | 2.1322                      |
| 250     | 12.5823              | 13.1627              | 20.6843              | 2.1199                      |
| 300     | 12.5997              | 13.1793              | 20.7519              | 2.1074                      |

## S2 Bulk Modulus

The elements of the stiffness tensor  $C_{ij}$  are given by

$$C_{ij} = \frac{\sigma_i}{\epsilon_j}, \quad (\text{S1})$$

where  $\sigma_i$  is a component of the stress tensor and  $\epsilon_j$  is a component of the strain tensor based on the Voigt notation where  $i, j = 1, 2, \dots, 6$ . In our simulations,  $\epsilon_j$  is set to be 0.01. To get the stiffness tensor, we run an *NVT* simulation (i.e., constant number of atoms, volume, and temperature) using deformed simulation boxes with the strain  $\epsilon_j$  for  $2 \times 10^6$  time steps. Then, the stress tensor is collected every 10 time steps and obtained by averaging the last  $10^6$  time steps.

Once the stiffness tensor is obtained, the effective bulk modulus  $B_{\text{VRH}}$  can be estimated by the Voigt-Reuss-Hill averaging scheme from<sup>7,8</sup>

$$B_{\text{VRH}} = \frac{B_V + B_R}{2}, \quad (\text{S2})$$

where  $B_V$  and  $B_R$  are the effective bulk moduli obtained by Voigt averaging and Reuss averaging. The Voigt averaging scheme is based on the stiffness tensor:

$$B_V = \frac{A + 2B}{3}, \quad (\text{S3})$$

where

$$A = \frac{C_{11} + C_{22} + C_{33}}{3}, \quad B = \frac{C_{23} + C_{13} + C_{12}}{3}. \quad (\text{S4})$$

The Reuss averaging scheme is based on the compliance tensor  $S_{ij}$ , the inverse of the stiffness tensor:

$$B_R = \frac{1}{3a + 6b}, \quad (\text{S5})$$

where

$$a = \frac{S_{11} + S_{22} + S_{33}}{3}, \quad b = \frac{S_{23} + S_{13} + S_{12}}{3}. \quad (\text{S6})$$

The calculated bulk moduli of the unary and binary SACs are plotted in Figure S10 as a function of temperature. [CoTe] is the stiffest unary SAC, while [CoS] and both phases of [CoSe] have similar values. For the binary SACs, [CoSe][C<sub>60</sub>]<sub>2</sub> (P $\bar{3}$ ) is the stiffest, while [CoSe][C<sub>60</sub>]<sub>2</sub> (P $\bar{3}$ m1) is the softest. The effects of phase is not as significant on the bulk modulus of [CoTe][C<sub>60</sub>]<sub>2</sub> as compared to [CoSe][C<sub>60</sub>]<sub>2</sub>.



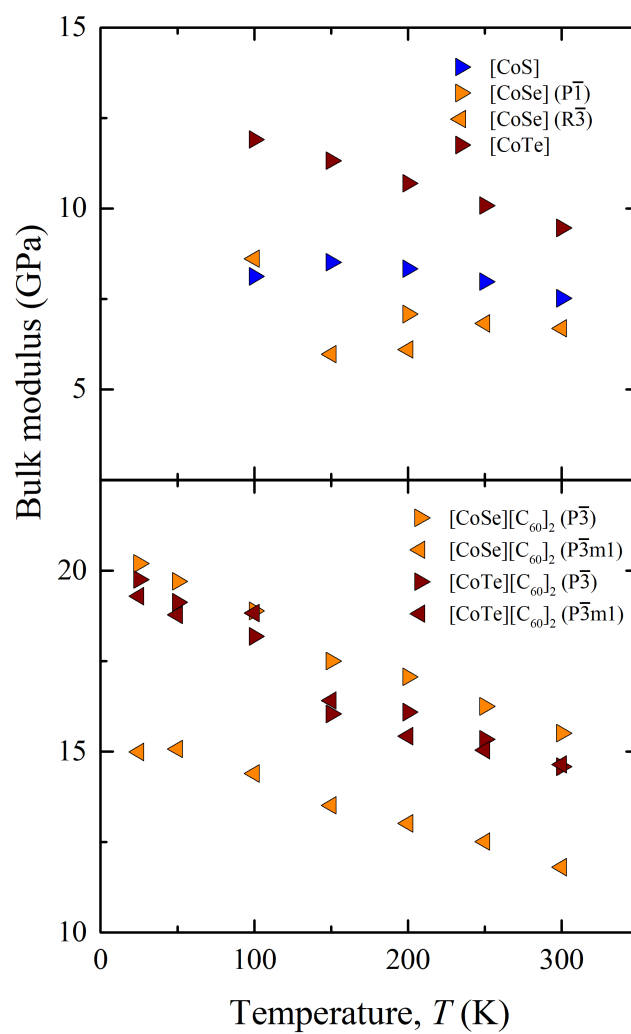

Figure S10: MD-predicted bulk moduli of the unary and binary SACs

### S3 Thermal Conductivity

The thermal conductivity in the  $\alpha$  direction,  $k_\alpha$ , is predicted using the Green-Kubo method from

$$\kappa_\alpha = \frac{1}{k_B V T^2} \int_0^\infty \langle q_\alpha(t) q_\alpha(0) \rangle dt, \quad (\text{S7})$$

where  $q_\alpha$  is the  $\alpha$ -direction heat current,  $k_B$  is Boltzmann constant,  $V$  is the volume of the simulation box and  $T$  is temperature.  $\langle q_\alpha(t) q_\alpha(0) \rangle$  is the heat current autocorrelation function (HCACF). The effect of the simulation box size on the predicted thermal conductivity at a temperature of 300 K for  $[\text{C}_{60}]$  and  $[\text{CoTe}][\text{C}_{60}]_2$  is presented in Table S10. The results suggest that a  $3 \times 3 \times 3$  unit cell system is sufficient to obtain a sized-converged value of thermal conductivity.

Table S10: Size-dependent thermal conductivities of  $[\text{C}_{60}]$  and  $[\text{CoTe}][\text{C}_{60}]_2$  ( $\text{P}\bar{3}\text{m1}$ ) at a temperature of 300 K.

| Box size              | $[\text{C}_{60}]$ | $[\text{CoTe}][\text{C}_{60}]_2$ ( $\text{P}\bar{3}\text{m1}$ ) |                   |
|-----------------------|-------------------|-----------------------------------------------------------------|-------------------|
| (unit cells)          | $a/b/c$ (W/m-K)   | $a/b$ (W/m-K)                                                   | $c$ (W/m-K)       |
| $2 \times 2 \times 2$ | $0.358 \pm 0.025$ | $0.157 \pm 0.006$                                               | $0.180 \pm 0.004$ |
| $3 \times 3 \times 3$ | $0.390 \pm 0.054$ | $0.171 \pm 0.004$                                               | $0.210 \pm 0.005$ |
| $4 \times 4 \times 4$ | $0.399 \pm 0.018$ | $0.183 \pm 0.010$                                               | $0.188 \pm 0.002$ |

The predicted thermal conductivities of the unary SACs are plotted in Figures S11(a)-S11(d) as a function of temperature. The calculation method for unary SACs is the same as that for binary SACs described in the main text. The predicted thermal conductivity magnitudes and trends agree moderately well with the experimental data<sup>3</sup>. All the unary SACs have an amorphous-like thermal conductivity, as observed in the experiments.

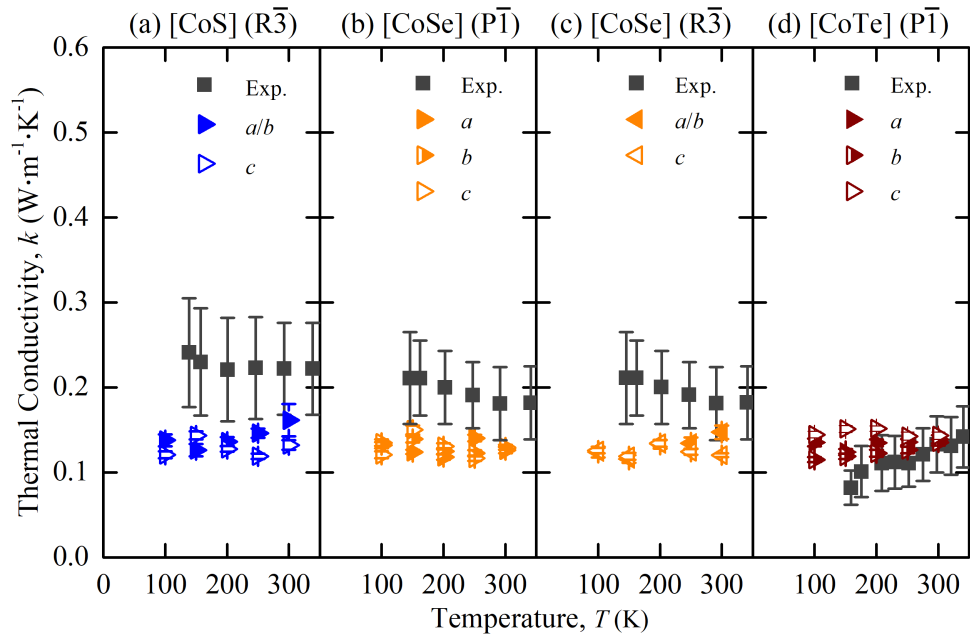

Figure S11: MD-predicted thermal conductivities of the unary SACs and experimental data.<sup>3</sup> [CoSe] experiences a phase transition from  $\text{P}\bar{1}$  to  $\text{R}\bar{3}$  between temperatures of 100 K and 293 K. Because the phase transition temperature is unknown, we plot the [CoSe] experimental data in both (b) and (c).

## S4 Carbon Atom Trajectories

Atomic trajectories for carbon atoms in the binary SACs are provided in Figures S12-S15 at various temperatures to supplement those given in the main text in Figures 4(a)-4(c). These plots clearly show the fullerene cages transitioning from librating to freely rotating with increasing temperature.

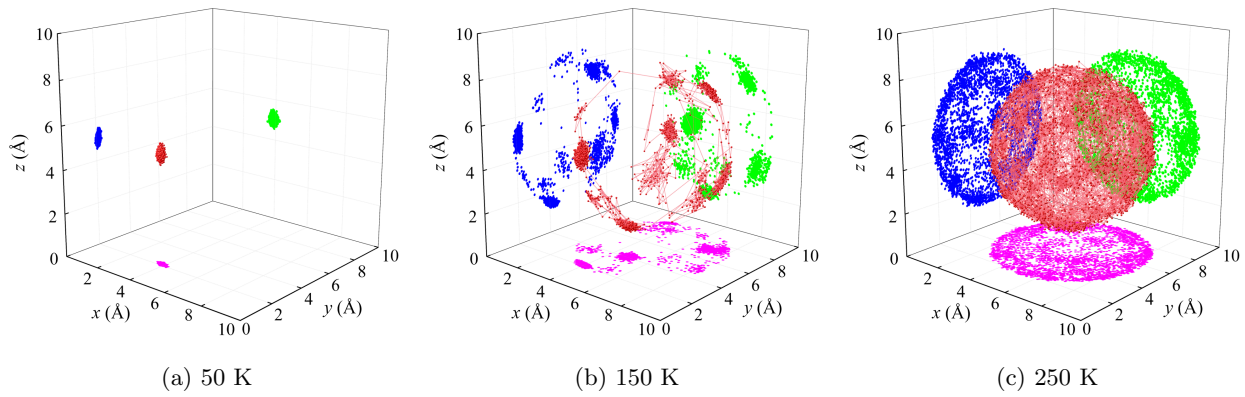

Figure S12: Trajectories of a carbon atom in  $[\text{CoSe}][\text{C}_{60}]_2$  ( $P\bar{3}$ ) at various temperatures.

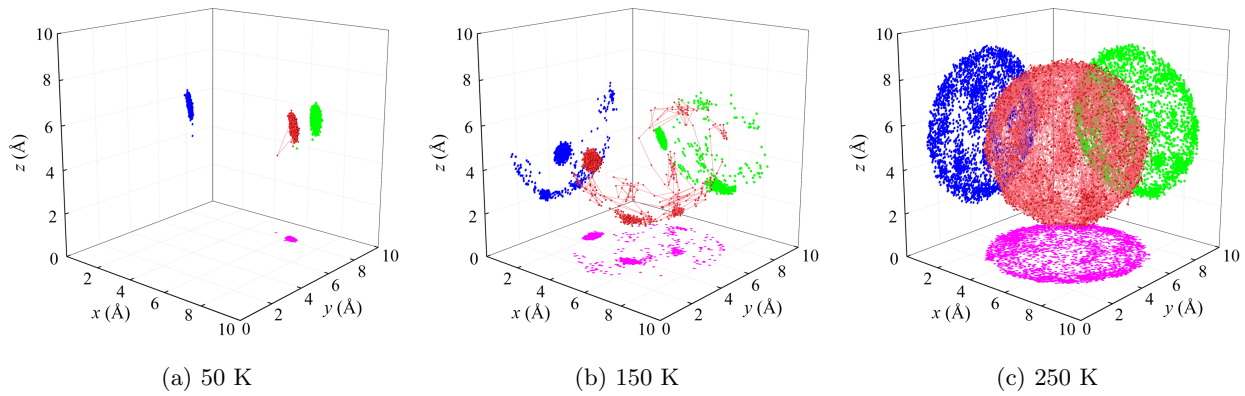

Figure S13: Trajectories of a carbon atom in  $[\text{CoSe}][\text{C}_{60}]_2$  ( $P\bar{3}m1$ ) at various temperatures.

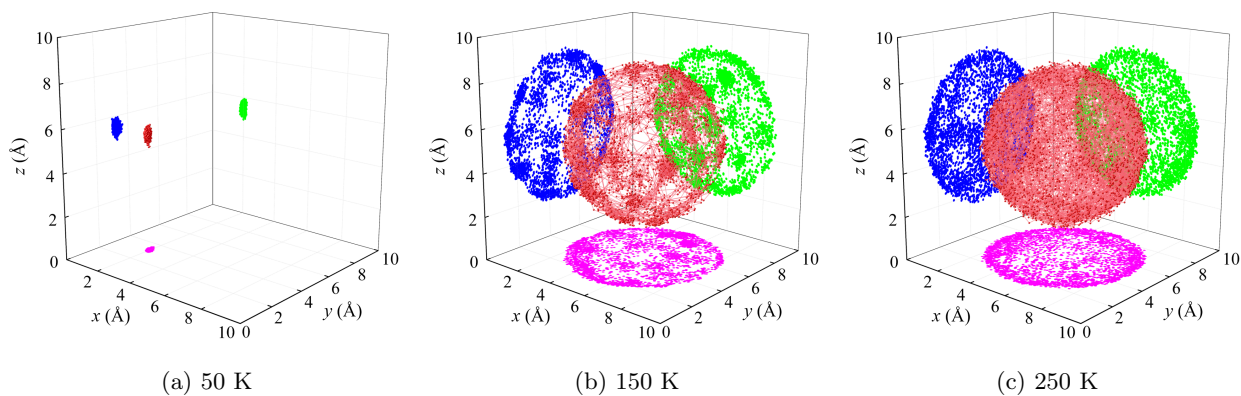

Figure S14: Trajectories of a carbon atom in  $[\text{CoTe}][\text{C}_{60}]_2$  ( $\text{P}\bar{3}$ ) at various temperatures.

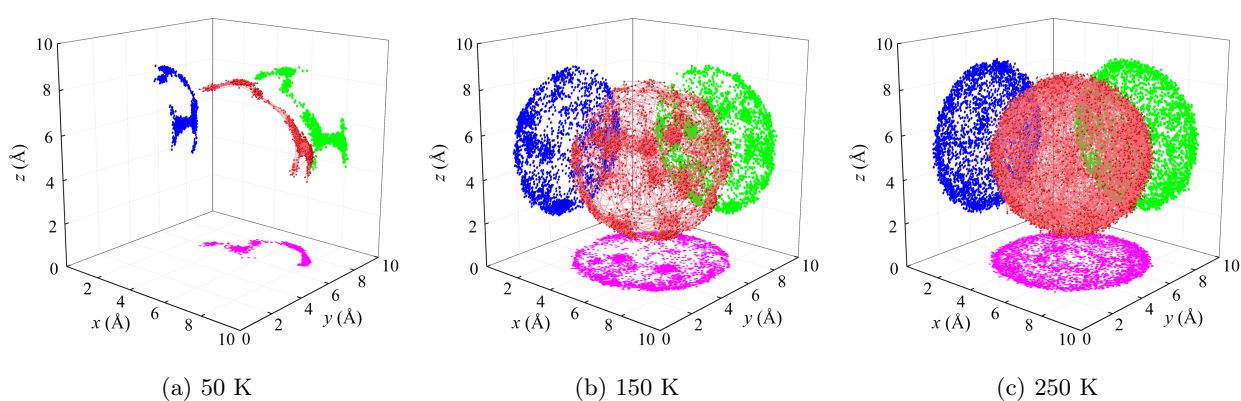

Figure S15: Trajectories of a carbon atom in  $[\text{CoTe}][\text{C}_{60}]_2$  ( $\text{P}\bar{3}\text{m}1$ ) at various temperatures.

## S5 C<sub>60</sub> Relative Angle Distribution

The temperature-dependent distribution of the minimum relative angle  $\theta$  between pairs of C<sub>60</sub> molecules are plotted in Figures S16 ([C<sub>60</sub>]) and S17(a)-S17(d) (binary SACs). In [C<sub>60</sub>], below a temperature of about 125 K, the relative angle between two molecules is less than 10° and there is orientational order. As the temperature increases, the distributions for both [C<sub>60</sub>] and the binary SACs widen, indicating that the cages are exploring more of the rotational phase space while still coordinating to their neighboring molecules. Above 212.5 K for pure [C<sub>60</sub>], the relative angle is nearly evenly distributed between 0 and 37.5°. The molecules are orientational disordered as there is no coordination of the angles of neighboring molecules. This phenomenon occurs for both binary compounds with the  $P\bar{3}$  crystal structure. The  $P\bar{3}m1$  crystal structures do not experience the narrowing of distribution at low temperatures because they are orientationally disordered at all temperatures.

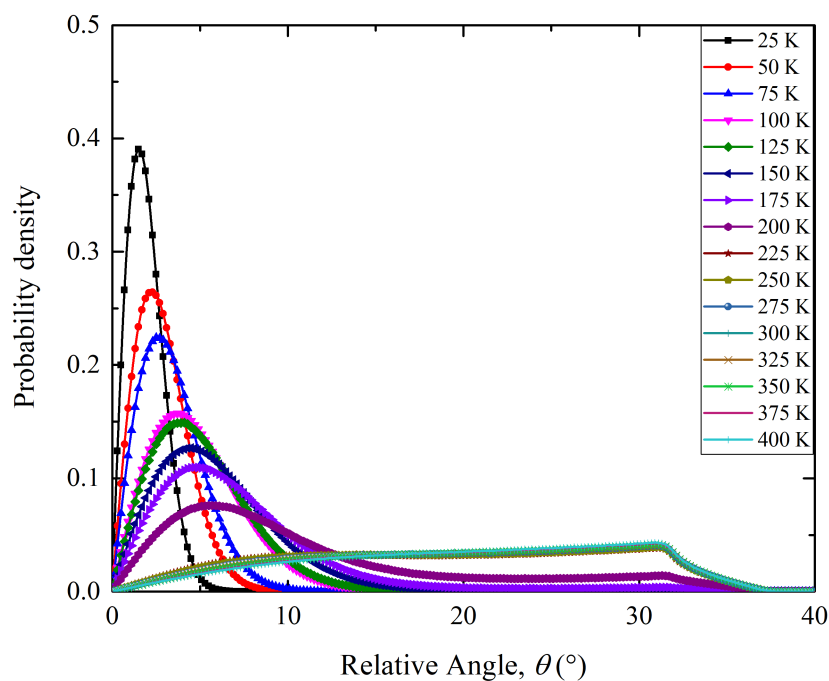

Figure S16: Distribution of the minimum relative angle between C<sub>60</sub> molecules in [C<sub>60</sub>].

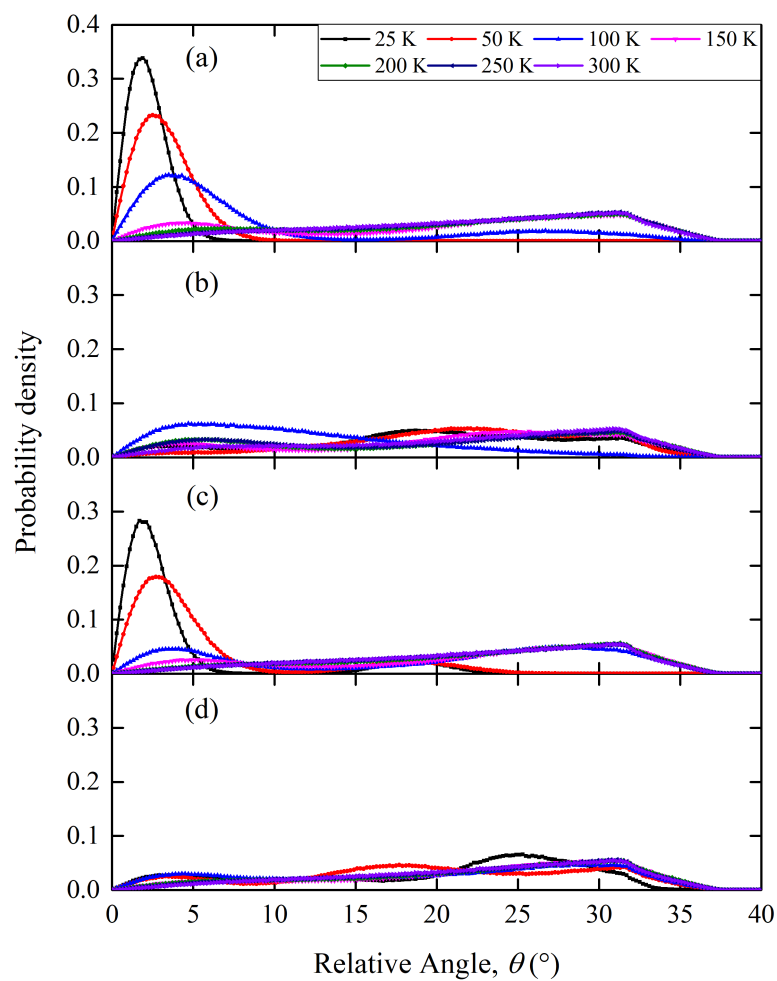

Figure S17: Distribution of the minimum relative angle between  $C_{60}$  molecules in (a)  $[CoSe][C_{60}]_2$  ( $P\bar{3}$ ), (b)  $[CoSe][C_{60}]_2$  ( $P\bar{3}m1$ ), (c)  $[CoTe][C_{60}]_2$  ( $P\bar{3}$ ), (d)  $[CoTe][C_{60}]_2$  ( $P\bar{3}m1$ ).

## S6 Rotational Potential Energy Barrier

As shown in Table 1 of the main text, while there is negligible difference in the SA- $C_{60}$  centroid-to-centroid distance for the various SACs, the  $C_{60}$ - $C_{60}$  centroid distance does show variation. We built a toy model to calculate the rotational potential energy barrier between two  $C_{60}$ s as a function of their centroid-to-centroid spacing, as shown in Figure S18. We rotate the right  $C_{60}$  molecule and calculate the total system potential energy. The centroid-to-centroid distance is set as the value for a given SAC at a temperature of 300 K. The calculated potential energy landscape is plotted in Figure S19.

As the centroid-to-centroid distance increases, the energy barrier decreases rapidly.  $[C_{60}]$  experiences the largest energy barrier of all the SACs studied. Among the binary SACs,  $[CoSe][C_{60}]_2$  in the  $P\bar{3}$  crystal structure has the highest energy barrier, followed by that of  $[CoTe][C_{60}]_2$  in the  $P\bar{3}$  crystal structure. The energy barrier for the two  $P\bar{3}m1$  phases is essentially zero, which is what leads them to be orientationally disordered at all temperatures and to exhibit an amorphous-like thermal conductivity. The thermal conductivities of  $[C_{60}]$  and the binary SACs exhibit a crystal-like behavior only when the energy barrier is high enough that the  $C_{60}$ s are orientationally ordered.

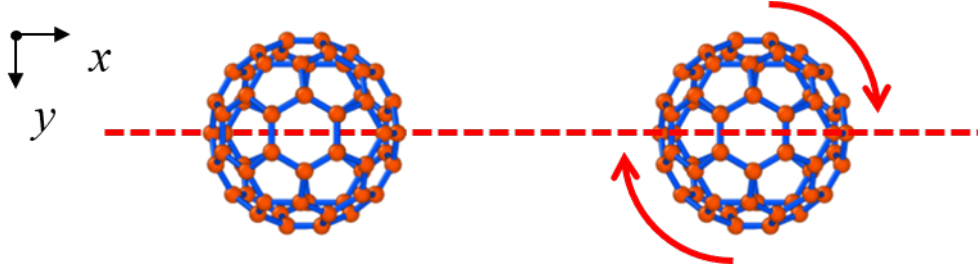

Figure S18: Model for calculating the rotational potential energy landscape and barrier.



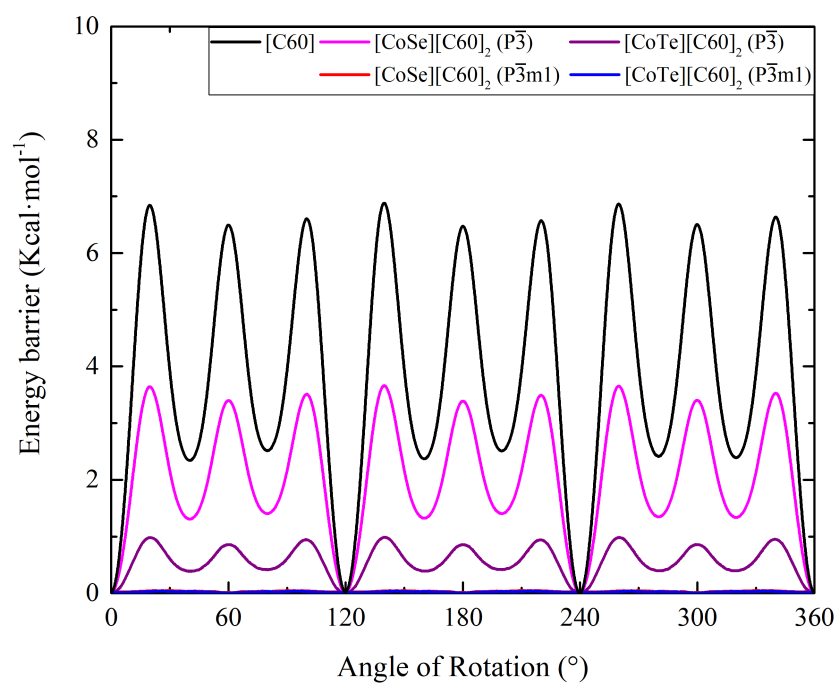

Figure S19: Potential energy landscape and barrier for rotating  $C_{60}$  molecules based on their separation as found in the SACs at a temperature of 300 K. The separation is 9.8420 Å for  $[C_{60}]$ , 9.9495 Å for  $[CoSe][C_{60}]_2$  ( $P\bar{3}$ ), 11.2408 Å for  $[CoSe][C_{60}]_2$  ( $P\bar{3}m1$ ), 10.1835 Å for  $[CoTe][C_{60}]_2$  ( $P\bar{3}$ ), and 11.3267 Å for  $[CoTe][C_{60}]_2$  ( $P\bar{3}m1$ ).

## References

- [1] C. R. Groom, I. J. Bruno, M. P. Lightfoot and S. C. Ward, *Acta Crystallogr. B*, 2016, **72**, 171–179.
- [2] W. I. F. David, R. M. Ibberson and T. Matsuo, *Proceedings of the Royal Society of London. Series A: Mathematical and Physical Sciences*, 1993, **442**, 129–146.
- [3] W.-L. Ong, E. S. O’Brien, P. S. M. Dougherty, D. Paley, C. F. Higgs, A. J. H. McGaughey, J. A. Malen and X. Roy, *Nat. Mater.*, 2017, **16**, 83–88.
- [4] N. M. O’Boyle, M. Banck, C. A. James, C. Morley, T. Vandermeersch and G. R. Hutchison, *J. Cheminformatics*, 2011, **3**, 33.
- [5] A. Jewett, *Moltemplate*, <https://moltemplate.org>.
- [6] C. E. Wilmer, K. C. Kim and R. Q. Snurr, *J. Phys. Chem. Lett.*, 2012, **3**, 2506–2511.
- [7] A. Marmier, Z. A. Lethbridge, R. I. Walton, C. W. Smith, S. C. Parker and K. E. Evans, *Comput. Phys. Commun*, 2010, **181**, 2102–115.
- [8] R. Gaillac, P. Pullumbi and F.-X. Coudert, *J. Phys. Condens. Matter*, 2016, **28**, 275201.
